# Supplementary material for: Effects of Acute and Chronic Resistance Exercise on the Skeletal Muscle Metabolome
Source: MDPI journal article supplement (doi:10.3390/metabo12050445), 2022-05-16

**Supplementary Figure S1:** Metabolite levels for all 6 participants at the three sampling points shown for all metabolites with significant changes listed in Table 1.

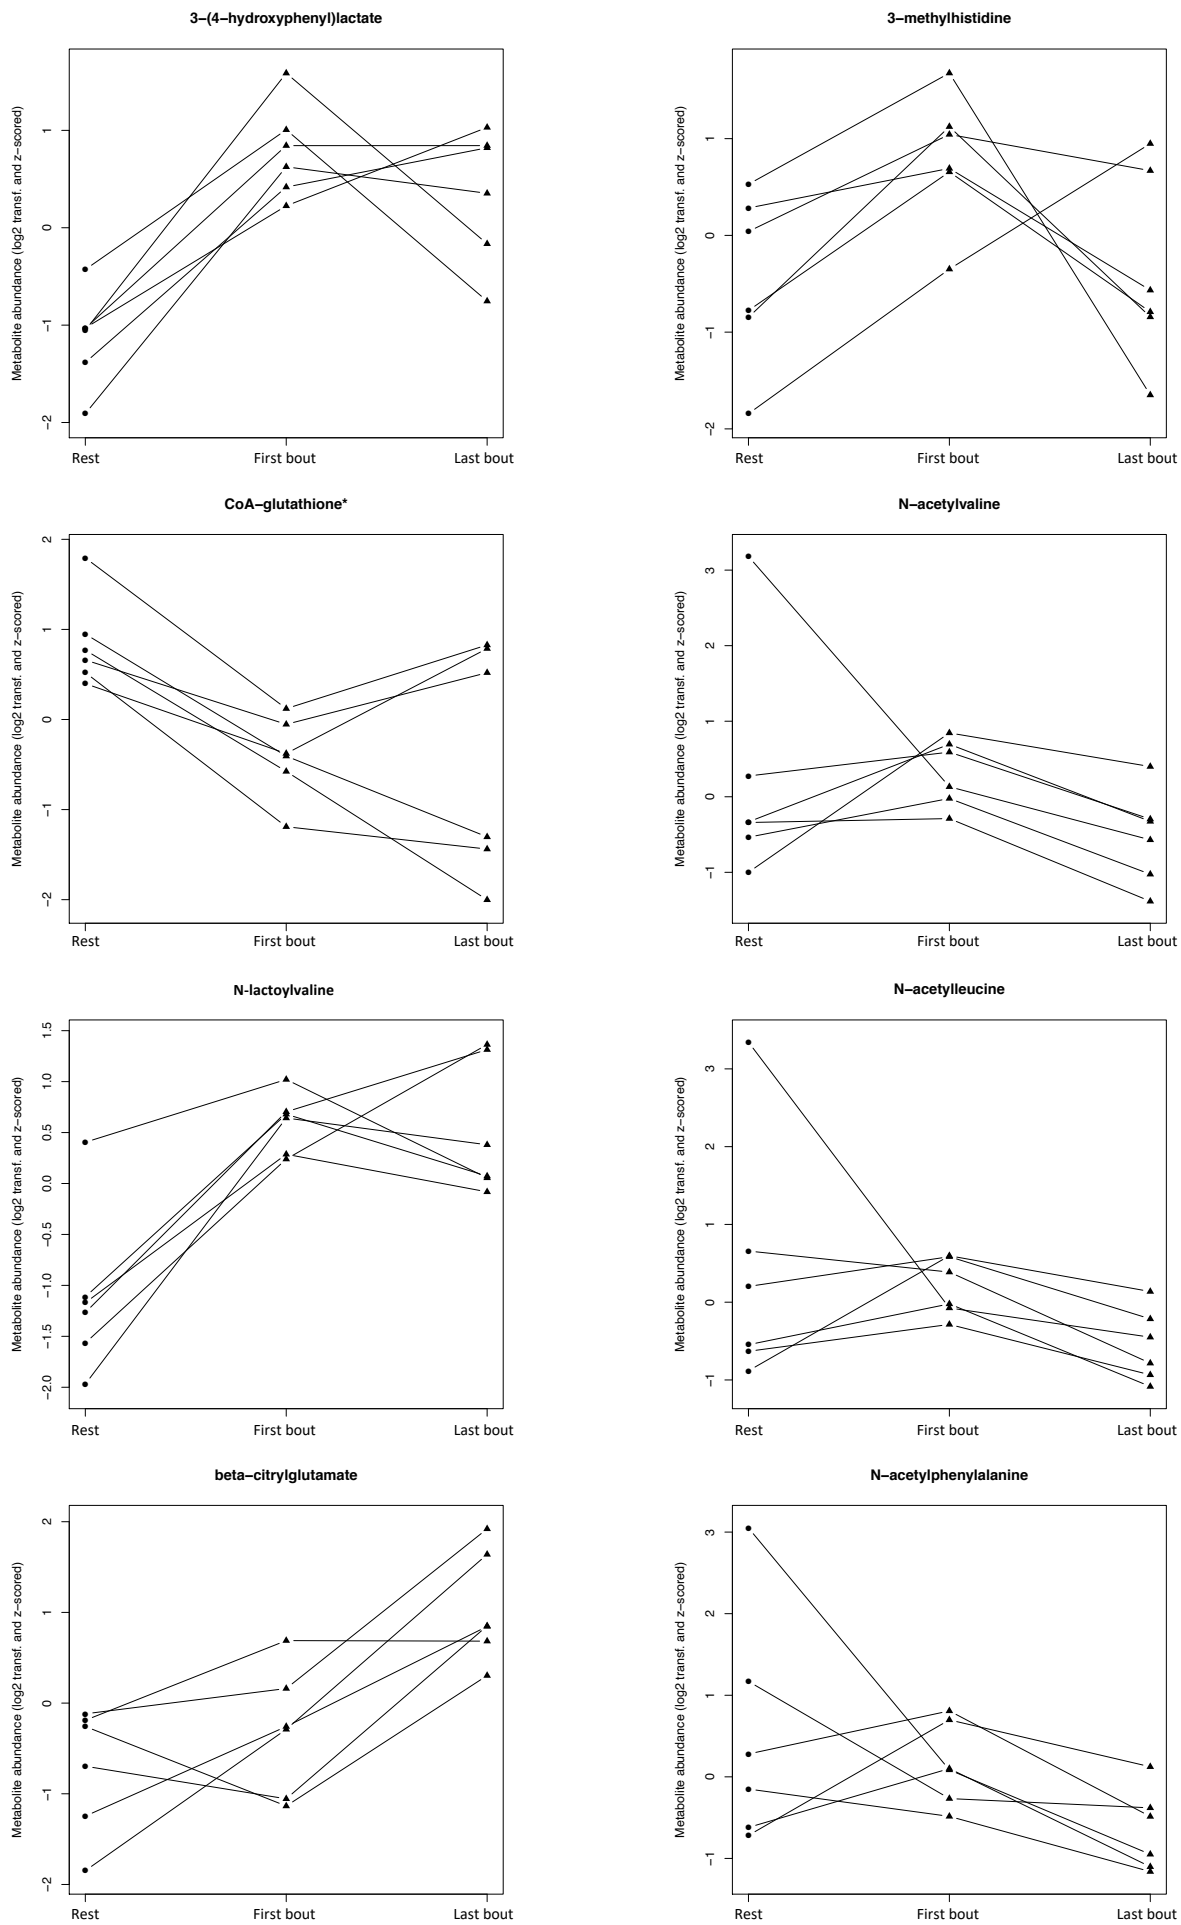

Supplementary Figure S1: continued.

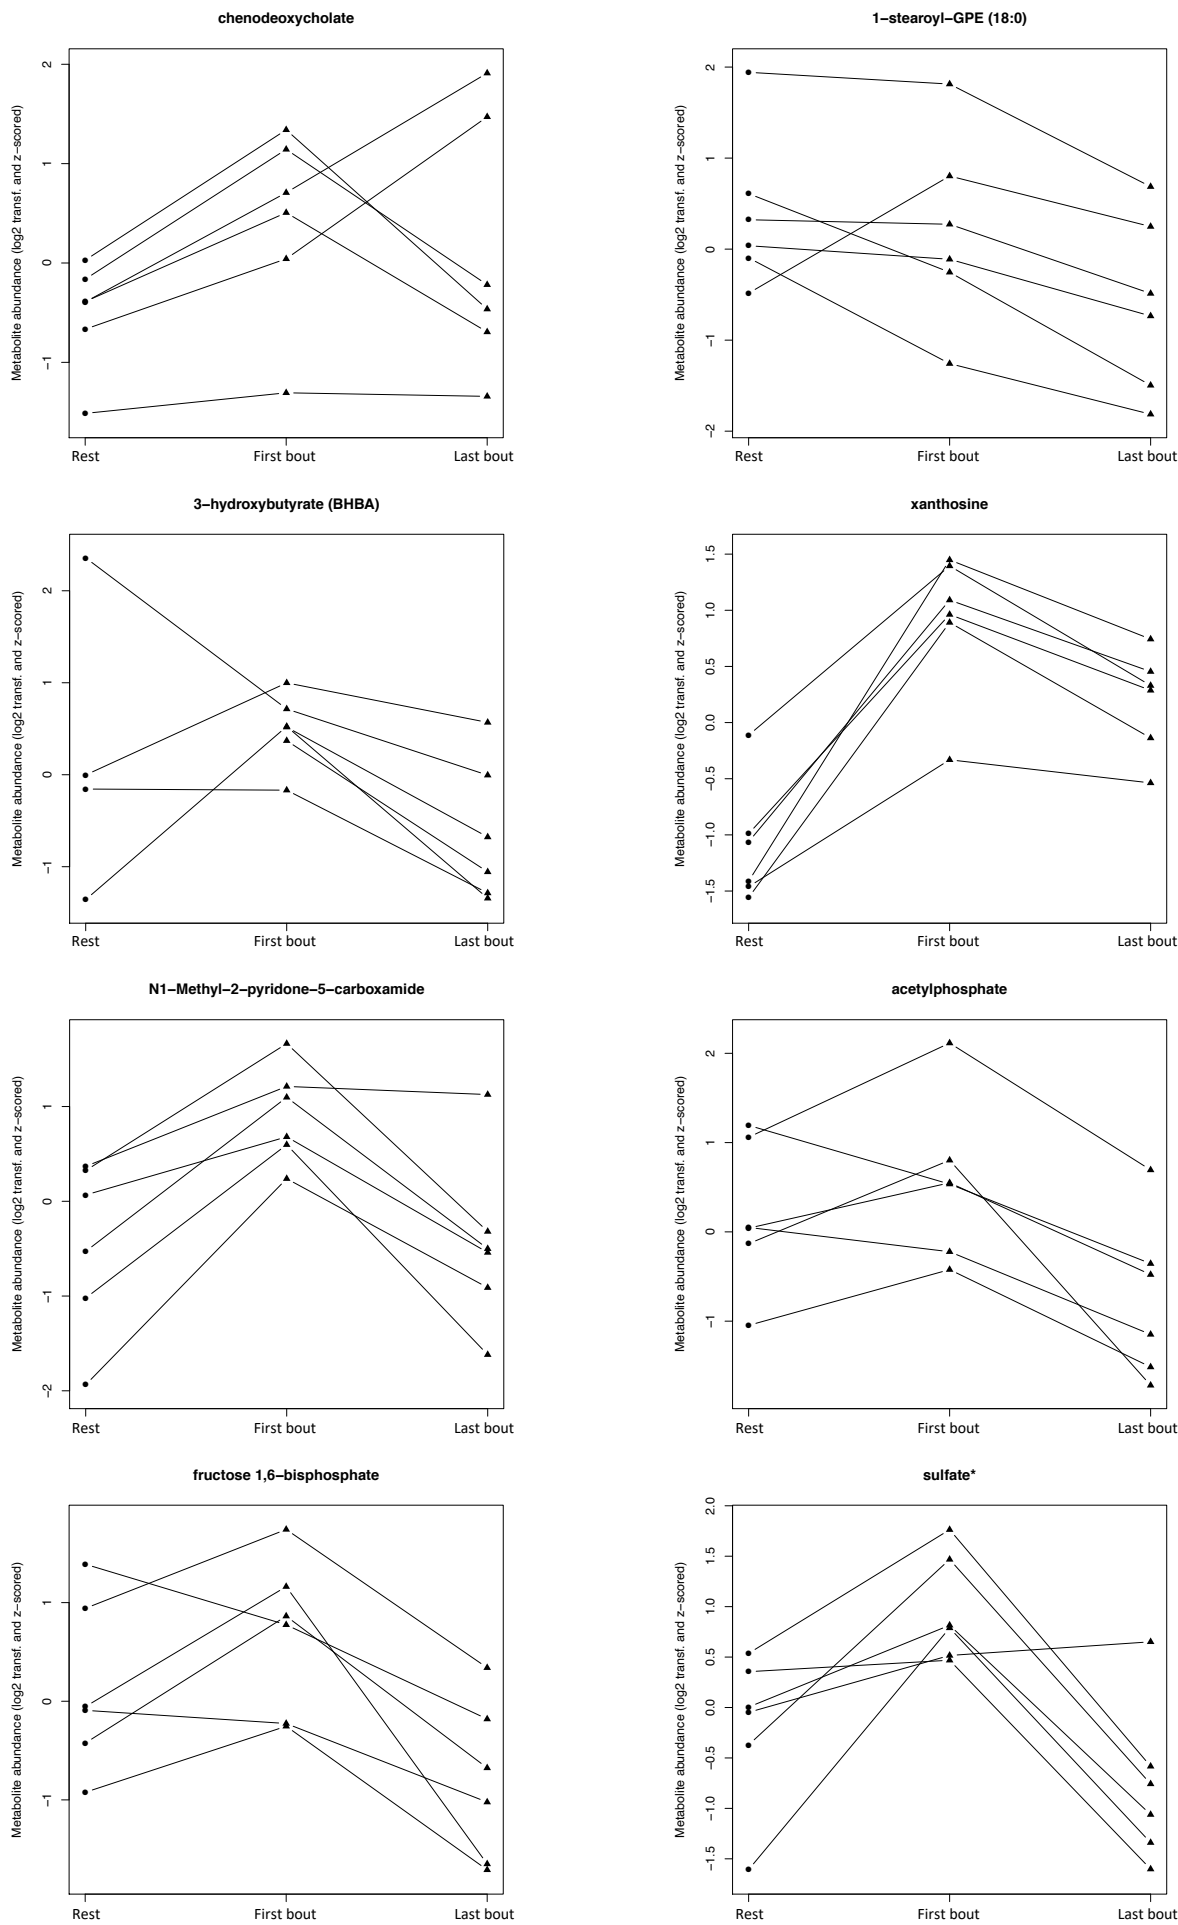

Supplement: s1 [file s1]
